# Supplementary material
Source: MDPI journal article supplement (https://www.mdpi.com/2227-9717/11/6/1648)
Supplement: s1 [file s1]

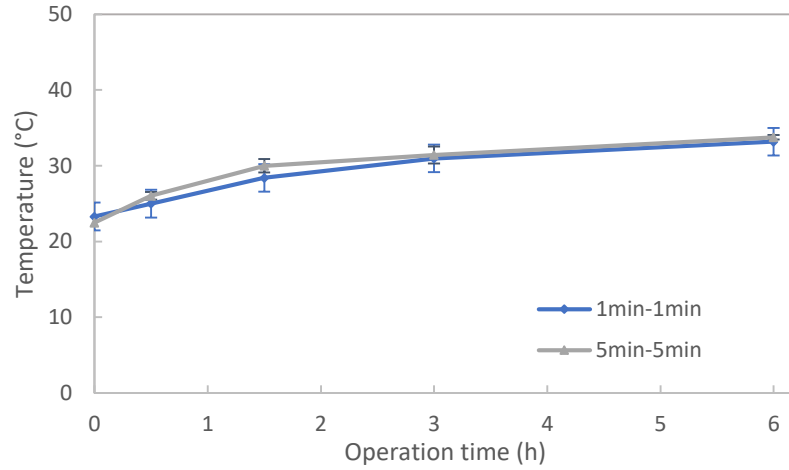

**Figure S1.** Temperature change of brewer's spent grain (BSG) paste during ball milling with different milling-rest strategy (BSG paste prepared with DI water (20%), balls/wet biomass ratio was 3, other operating conditions are the same as "BSG pretreatment methods" section).

**Table S1.** Brewer's spent grain (BSG) composition before and after different pretreatments.

|                   | BSG          | BM+EH <sup>1</sup> * | BM-EH <sup>2</sup> * | BM+EH        | BM-EH        |
|-------------------|--------------|----------------------|----------------------|--------------|--------------|
| BM setting        | NA           | 1 min-1 min          | 1 min-1 min          | 5 min-5 min  | 5 min-5 min  |
| Cellulose         | 28.1% ± 0.5% | 16.6% ± 1.3%         | 14.9% ± 0.4%         | 16.2% ± 0.6% | 14.7% ± 1.1% |
| Glucose           | -            | 10.8% ± 0.4%         | 11.7% ± 0.1%         | 10.1% ± 0.3% | 11.2% ± 0.4% |
| Hemicellulose     | 39.0% ± 0.5% | 24.2% ± 0.4%         | 23.2% ± 0.6%         | 23.3% ± 1.2% | 22.2% ± 0.9% |
| Xylose            | -            | 5.9% ± 0.1%          | 5.9% ± 0.0%          | 5.9% ± 0.3%  | 5.9% ± 0.2%  |
| ASL               | 3.4% ± 0.0%  | 3.2% ± 0.5%          | 3.8% ± 1.1%          | 2.9% ± 0.1%  | 3.3% ± 0.1%  |
| AIR               | 29.5% ± 0.6% | 25.9% ± 0.7%         | 22.1% ± 0.8%         | 24.8% ± 0.5% | 22.0% ± 2.0% |
| Undetected        | -            | 13.2% ± 0.0%         | 18.3% ± 0.0%         | 16.6% ± 0.0% | 20.5% ± 0.0% |
| CNV cellulose     | -            | 36.9±6.0%            | 41.5±1.9%            | 35.9±3.8%    | 40.8±5.4%    |
| CNV hemicellulose | -            | 17.5±1.9%            | 18.2±2.3%            | 18.1±6.5%    | 18.9±4.3%    |

<sup>1</sup> BM+EH: BSG sequentially went through ball milling (BM) (12 h) and enzymatic hydrolysis (EH) (21 h) pretreatments. <sup>2</sup> BM-EH: BSG sequentially went through BM (6 h), synergistic BM-EH (6h) and EH (15 h) pretreatments.

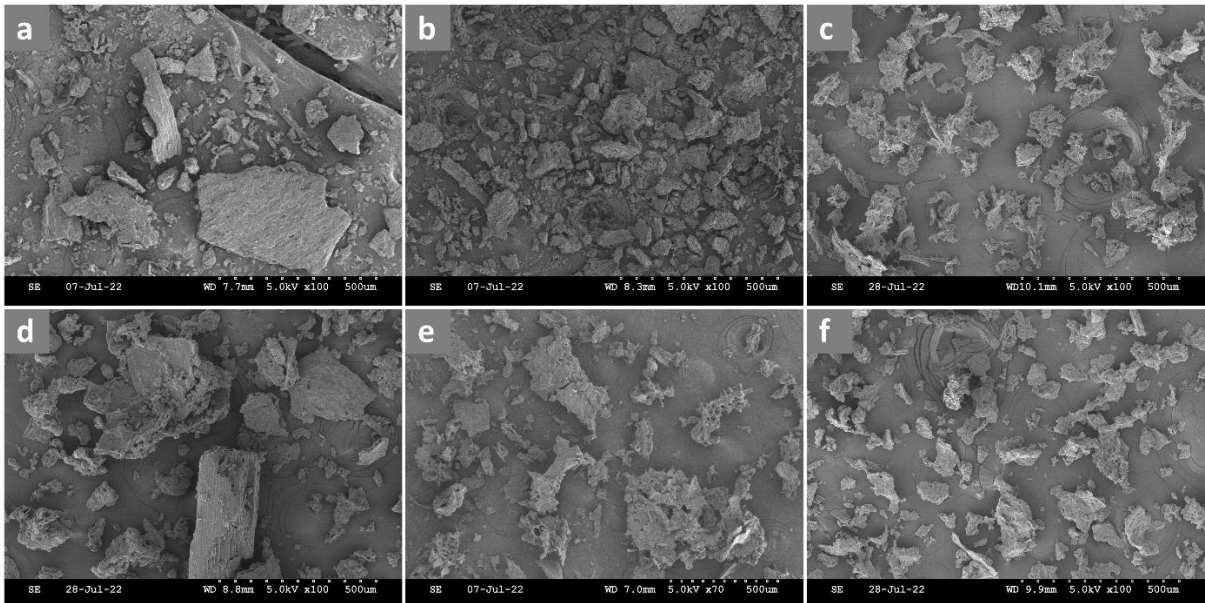

**Figure S2.** Scanning electron microscopic images of raw brewers' spent grain (BSG) (a) and BSG samples treated by ball milling for 1 cycle (BM-1) (b), ball milling for 2 cycles (BM-2) (c), enzymatic hydrolysis (EH) (d), synergistic BM-EH for 1 cycle (BM-EH-1) (e), and 2 cycles (BM-EH-2) (f), at lower magnification.

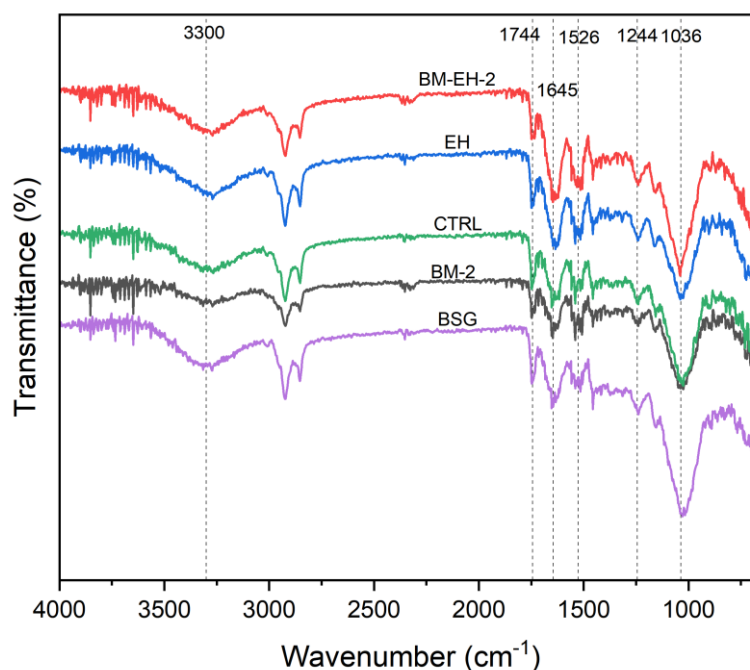

**Figure S3.** Fourier transform infrared spectroscopy (FTIR) spectra of raw and pretreated brewer's spent grain (BSG) samples (BM-EH-2 – BSG sample pretreated with synergistic ball milling and enzymatic hydrolysis for 2 cycles; EH – BSG sample pretreated by enzymatic hydrolysis; CTRL – controlled BSG sample subject with only autoclavation; BM-2 – BSG sample after ball milling for 2 cycles; BSG - raw BSG sample ground down to 0.5 mm).

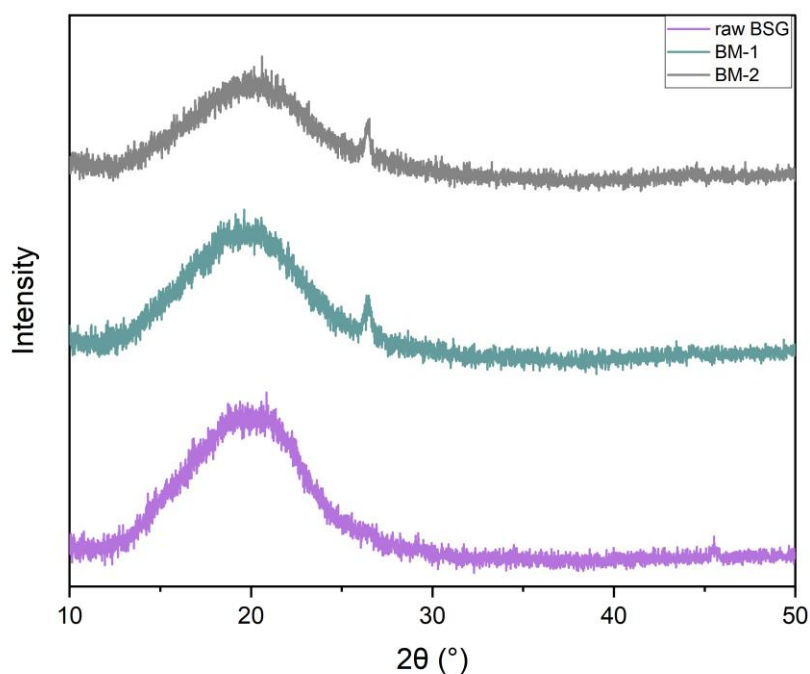

**Figure S4.** X-ray powder diffraction (XRD) spectra of raw and ball milled brewer's spent grain (BSG) samples (raw BSG - raw brewer's spent grain ground down to 0.5 mm; BM-1 – BSG sample after ball milling (BM) for 1 cycle; BM-2 – BSG sample after BM for 2 cycles).
